# Supplementary material
Source: PubMed Central journal article supplement (PMC1850849)

**Supplementary Figure 1:** LC-MS/MS structural elucidation of urinary PhIP metabolites. Conditions for LC-MS/MS were described in the *Experimental Procedures*. MS<sup>2</sup> fragmentation was conducted with collision energy ramping from 15 to 35 eV. **A.** MS<sup>2</sup> fragmentation of PhIP (**I**). **B.** MS<sup>2</sup> fragmentation of 4'-OH-PhIP (**III**). **C.** MS<sup>2</sup> fragmentation of N<sup>2</sup>-OH-PhIP (**IV**). **D.** MS<sup>2</sup> fragmentation of 5-OH-PhIP (**V**). **E.** MS<sup>2</sup> fragmentation of 4'-OH-PhIP sulfate (**VII**). **F.** MS<sup>2</sup> fragmentation of 5-OH-PhIP sulfate (**VIII**). **G.** MS<sup>2</sup> fragmentation of PhIP-N<sup>3</sup>-glucuronide (**XI**). **H.** MS<sup>2</sup> fragmentation of PhIP-N<sup>2</sup>-glucuronide (**XII**). **I.** MS<sup>2</sup> fragmentation of 4'-OH-PhIP glucuronide (**XIII**). **J.** MS<sup>2</sup> fragmentation of N<sup>2</sup>-OH-PhIP-N<sup>2</sup>-glucuronide (**XVI**). **K.** MS<sup>2</sup> fragmentation of N<sup>2</sup>-OH-PhIP-N<sup>3</sup>-glucuronide (**XVII**). **L.** MS<sup>2</sup> fragmentation of N<sup>2</sup>,4'-diOH-PhIP glucuronide (**XVIII**). Major daughter ions from fragmentation were interpreted in the inlaid structural diagrams.

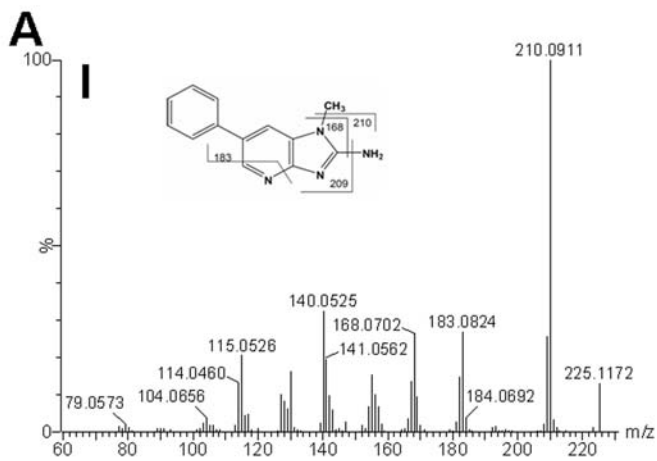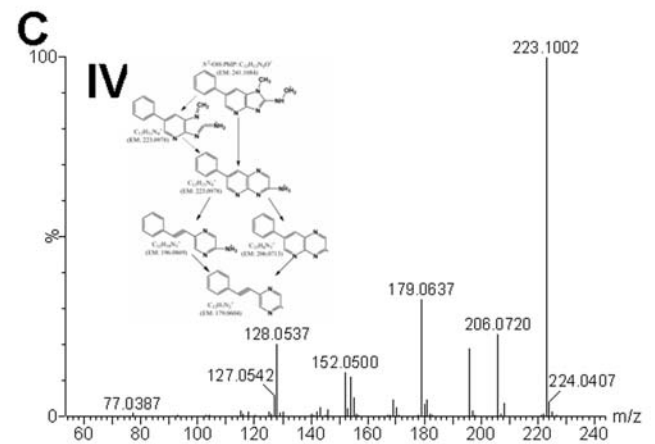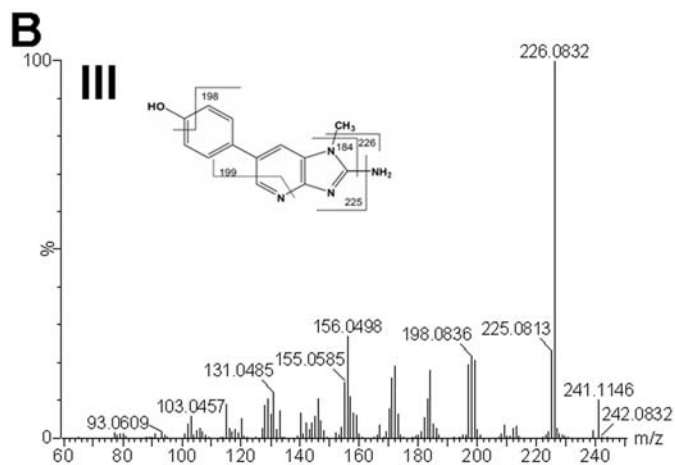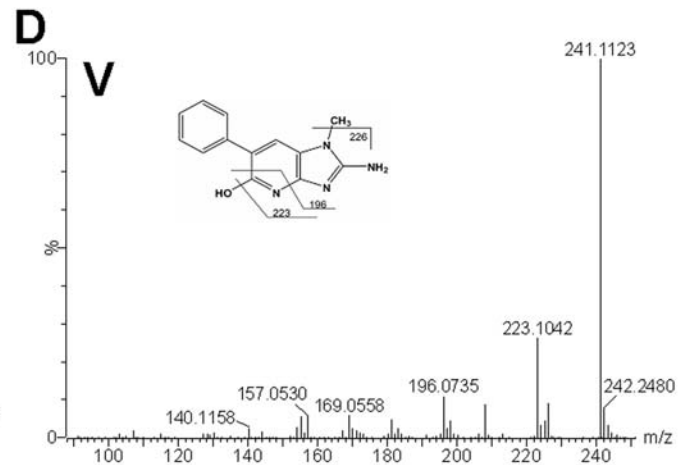

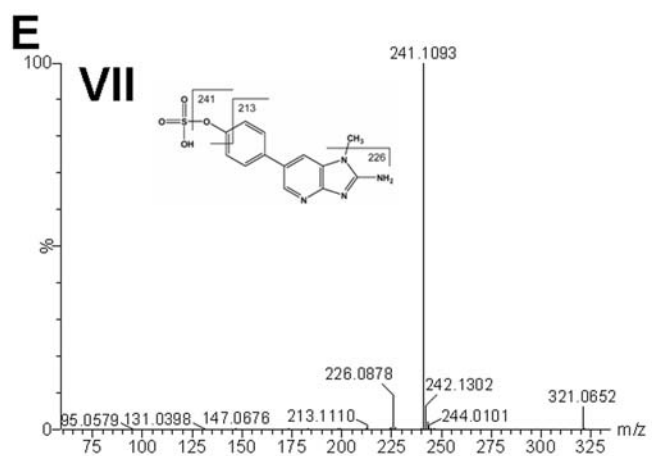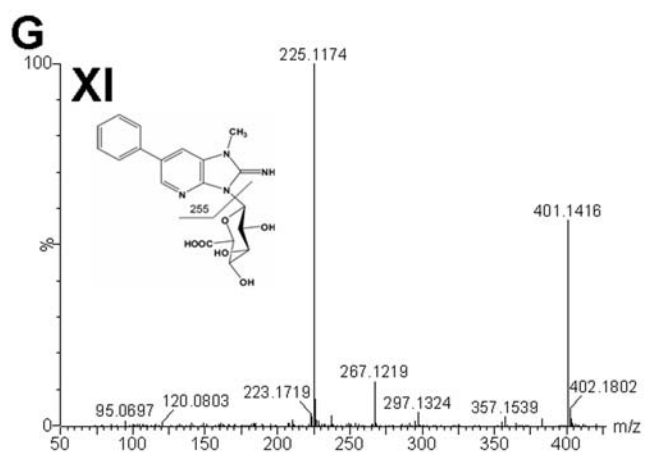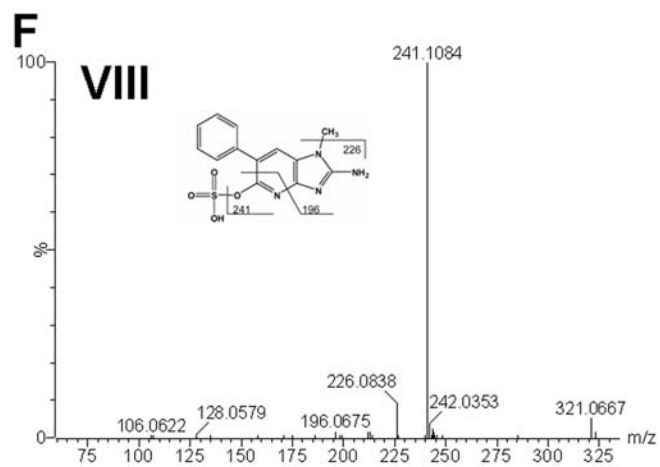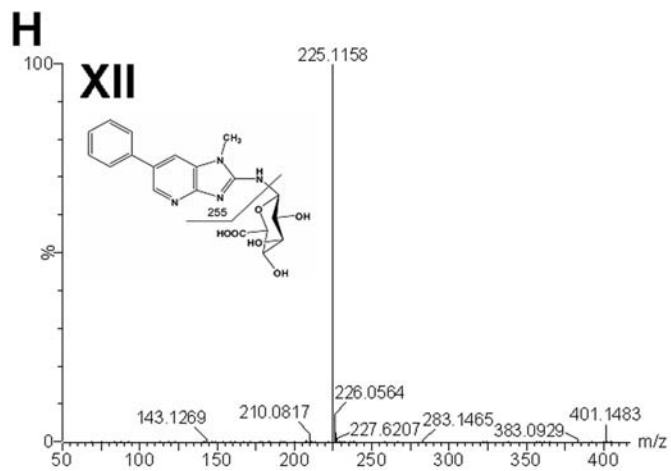

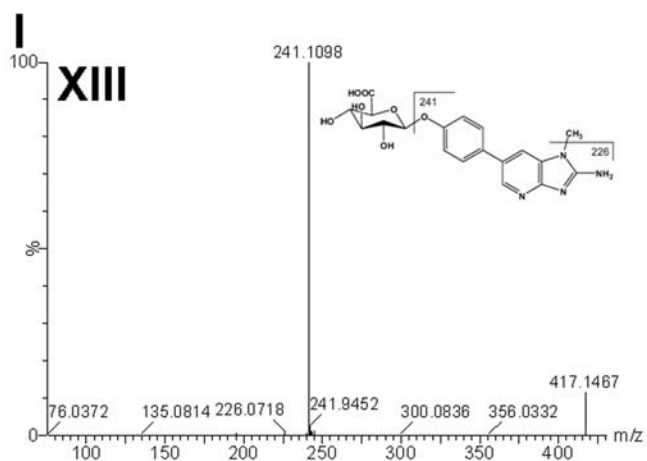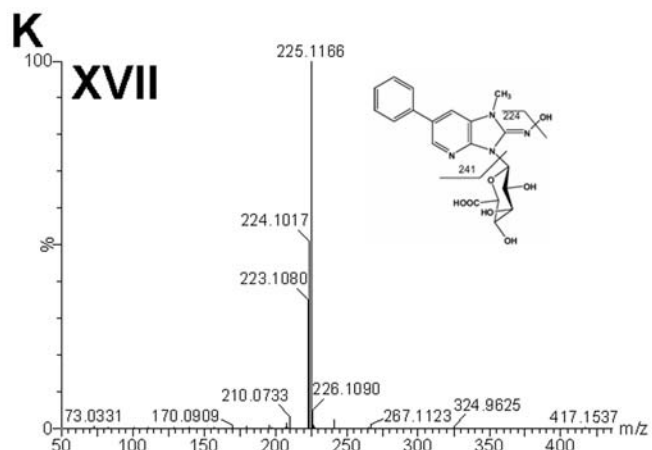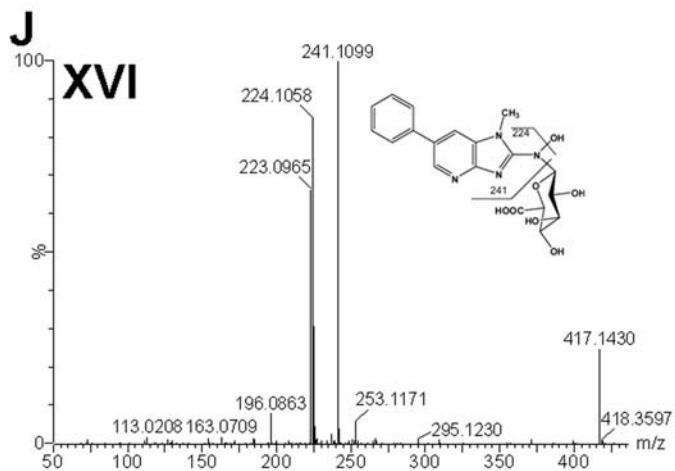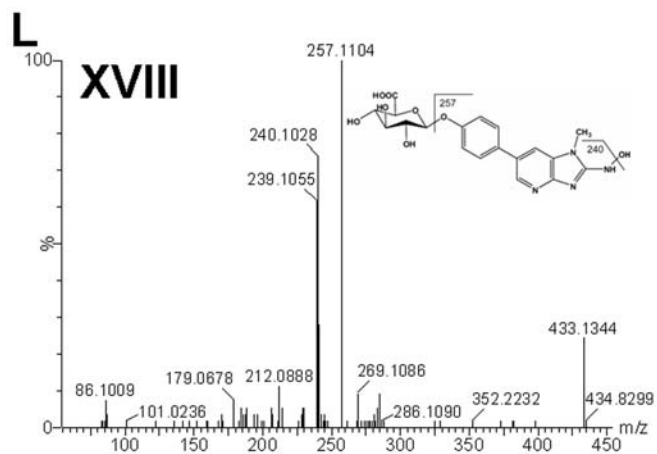

Supplement: NIHMS17597-supplement-Supp.pdf [file NIHMS17597-supplement-Supp.pdf]
